# Supplementary material for: LDL uptake-dependent phosphatidylethanolamine translocation to the cell surface promotes fusion of osteoclast-like cells
Source: Oxford University Press journal article supplement (doi:10.1242/jcs.243840), 2020-04-15
Supplement: jcs243840supp.pdf [file jcs243840supp.pdf]

## Supplementary information

**Table S1. Primer sequence used for genotyping of LDLR and LOX-1 KO mice.**

---

LDLR primers:

oIMR<sub>5284</sub>, 5'-GTCTGCGAATAGGCTGGTGTAAGCCATAGC-3'; (Primer-3, P-3)

oIMR<sub>5285</sub>, 5'-GATTGGGAAGACAATAGCAGGCATGC-3'; (Primer-E, P-E)

oIMR<sub>5286</sub>, 5'-TTTGAACTCAGGACTTCGTGCTCTGGCAGC-3'; (Primer-4, P-4)

LOX-1 primers:

LOX-1-1485F-2, 5'-CCTCGTGCTTTACGGTATCGCC-3'

LOX-1(genotype)Del1064-F, 5'-CCTTCAAGACGGAGCTGTGTTCGCTG-3'

LOX-1(genotype)-R, 5'-CCAGGTCAGGCAGGAAGCATCATTTA-3'

ABCG1 primers:

G1 E, 5'-GGGATCTCTGGGAAATTCAACAGTG-3'

G1ET, 5'-GTGAGCAGAGCTTCTGGTAGCAAAC-3'

Neo, 5'-GGGCCAGCTCATTCCCTCCCACTCAT-3'

---

**Table S2. Taqman probe ID.**

---

*c-Fos* mRNA (*c-Fos*, Mm00487425\_m1)

*NFATc1* mRNA (*Nfatc1*, Mm00479445\_m1)

*TRAP* mRNA (*Acp5*, Mm00475698\_m1)

*cathepsin K* mRNA (*Ctsk*, Mm00484039\_m1)

*DC-STAMP* mRNA (*Dcstamp*, Mm04209236\_m1)

*OC-STAMP* mRNA (*Ocstamp*, Mm00512445\_m1)

*ATA6v0d2* mRNA (*Atp6v0d2*, Mm01222963\_m1)

*ABCA1* mRNA (*Abca1*, Mm00442646\_m1)

*ABCA2* mRNA (*Abca2*, Mm00431553\_m1)

*ABCA3* mRNA (*Abca3*, Mm00550501\_m1)

*ABCA4* mRNA (*Abca4*, Mm00492035\_m1)

*ABCB1* mRNA (*Abcb1 $\alpha$* , Mm00440761\_m1)

*ABCB1* mRNA (*Abcb1 $\beta$* , Mm00440736\_m1)

*ABCB4* mRNA (*Abcb4*, Mm00435630\_m1)

*ABCG1* mRNA (*Abcg1*, Mm00437390\_m1)

*ABCG4* mRNA (*Abcg4*, Mm00507247\_m1)

*LXR $\alpha$*  mRNA (*Lxr- $\alpha$* , Mm00443451\_m1)

*LXR $\beta$*  mRNA (*Lxr- $\beta$* , Mm00437265\_m1)

18S rRNA (Mm03928990\_g1)

---

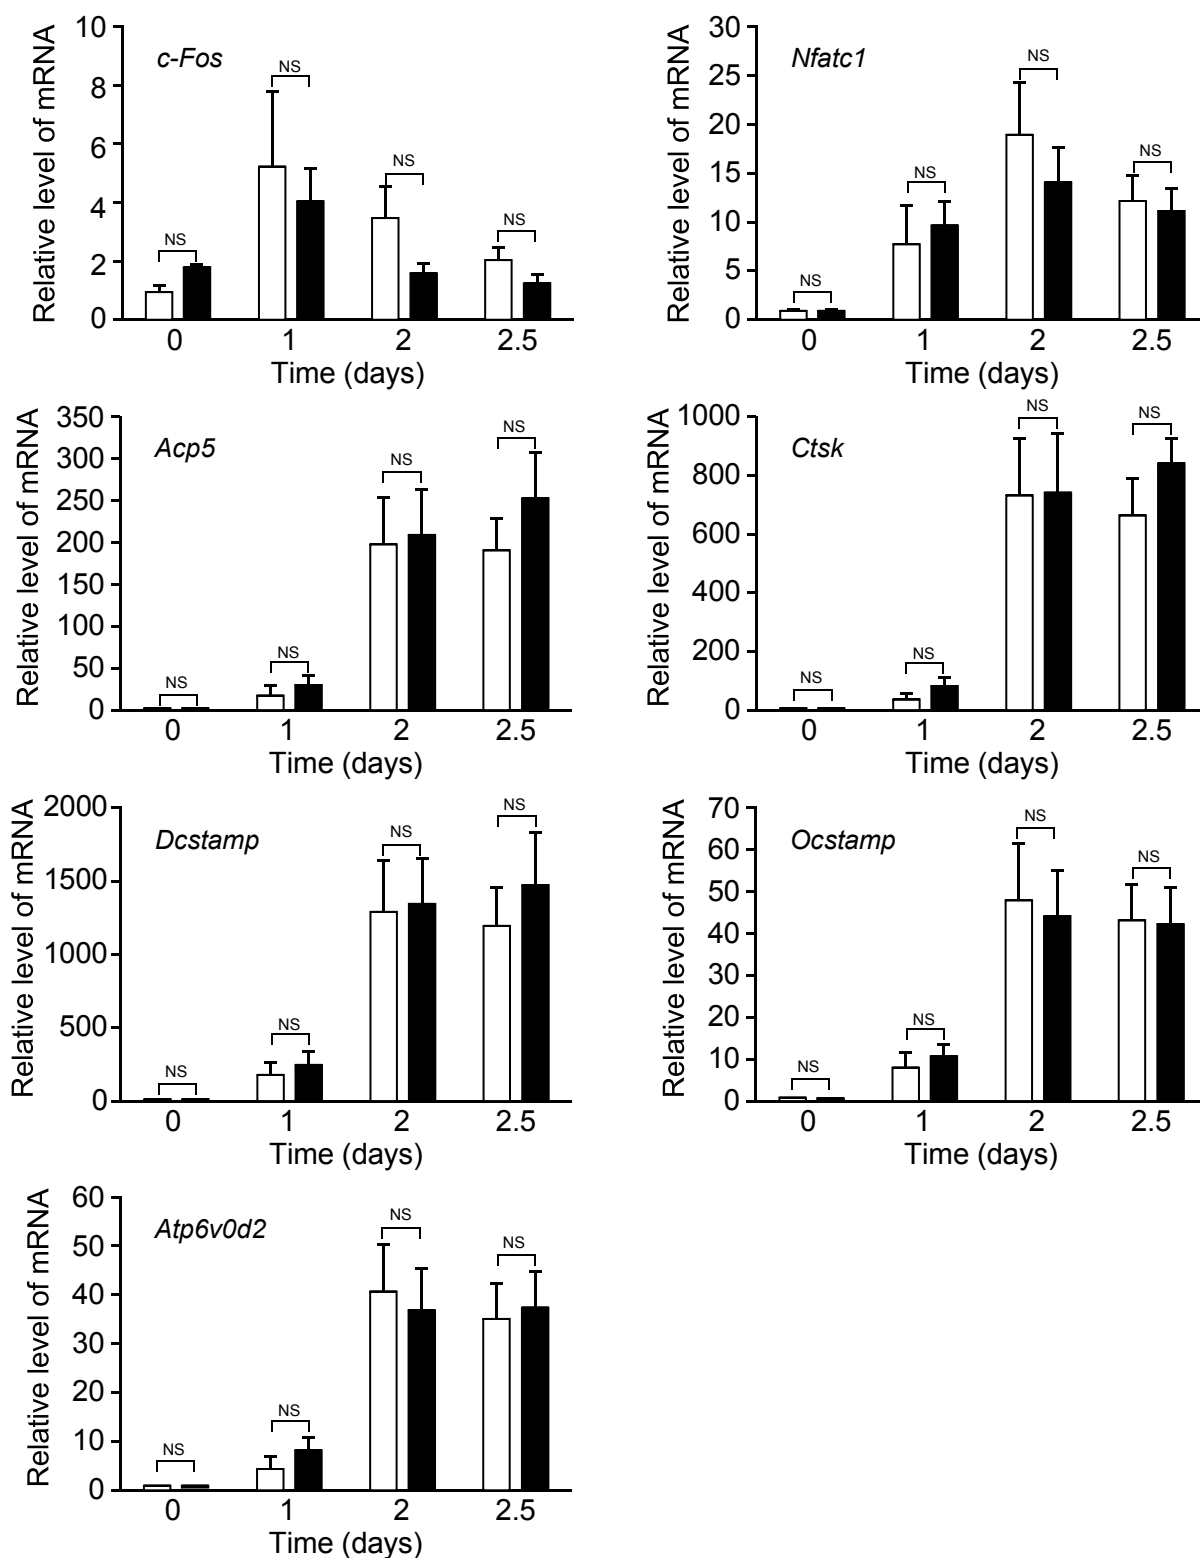

**Fig. S1. Expression of osteoclast differentiation-related genes in *LDLR1/LOX-1* double knockout (dKO) OCLs.** OCL-precursors from wild-type (WT, open bars) and *LDLR1/LOX-1* dKO (closed bars) bone marrow cells were cultured with sRANKL (10 ng/ml) and M-CSF (20 ng/ml) for the indicated days. After culture, total RNA was prepared, and the synthesized cDNA was subjected to quantitative real-time RT-PCR to determine the mRNA levels of c-Fos (*c-Fos*), NFATc1 (*Nfatc1*), TRAP (*Acp5*), cathepsin K (*Ctsk*), DC-STAMP (*Dcstamp*), OC-STAMP (*Ocstamp*) and ATP6v0d2 (*Atp6v0d2*) during osteoclastogenesis. The values represent the mean  $\pm$  SD (n = 3). NS means that the difference was not significant between the cultures of WT and dKO OCLs on each day.

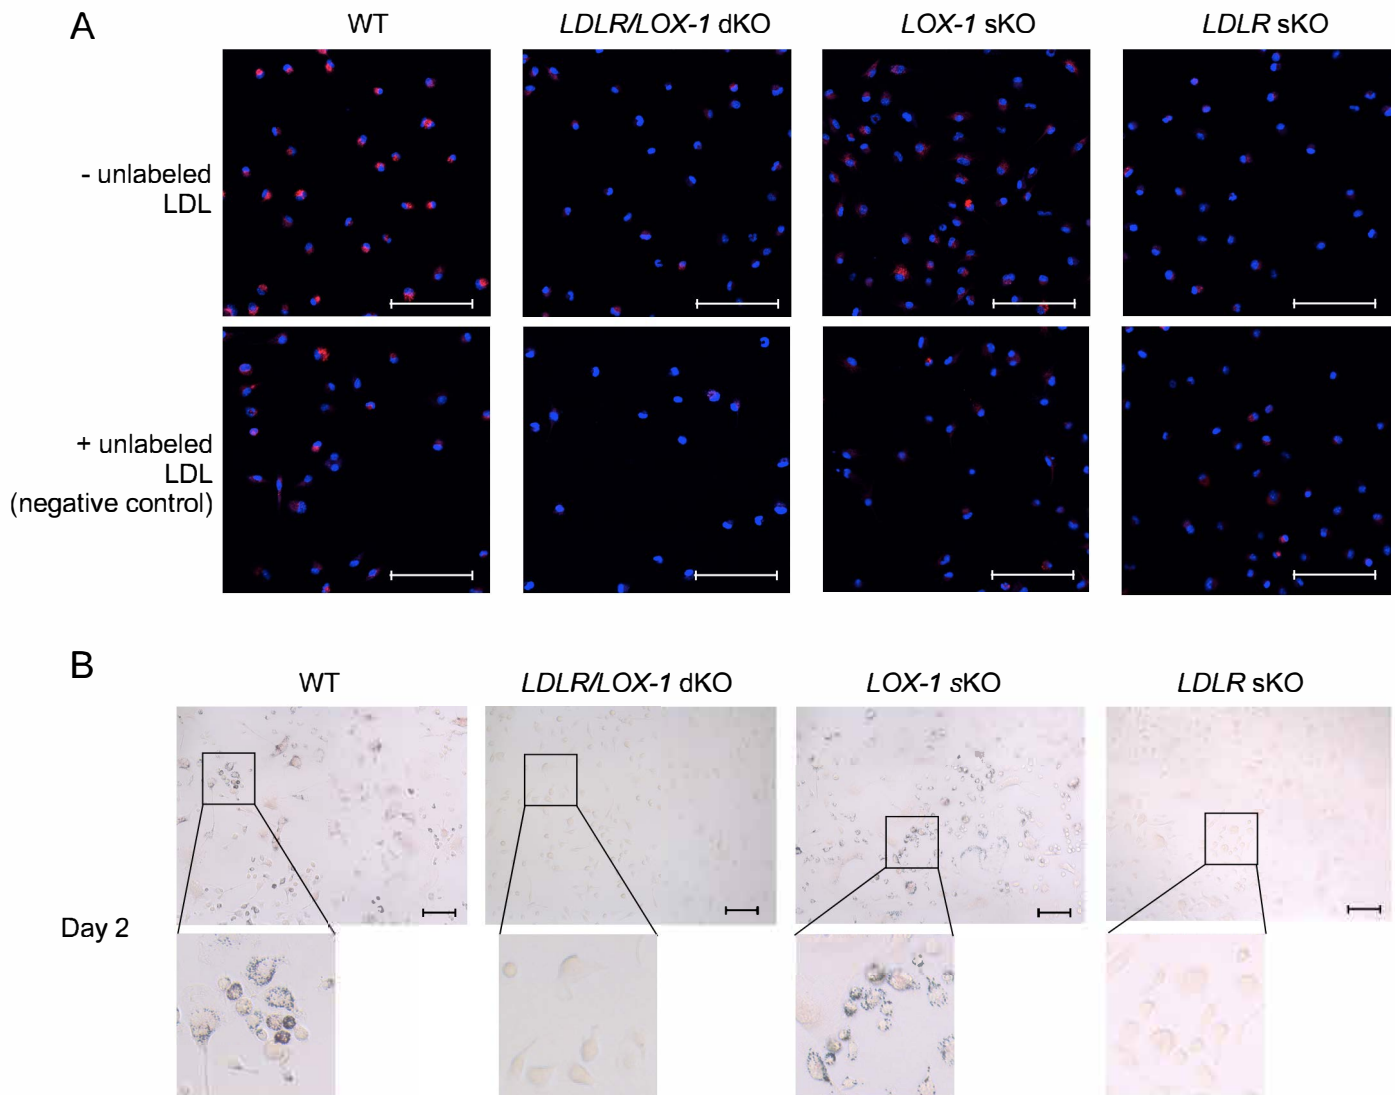

**Fig. S2. Uptake of LDL into osteoclastic cells from WT and *LDLR/LOX-1* dKO OCL-precursors and the accumulation of neutral lipids, including cholesterol, in the cells.** (A) After OCL-precursors of WT, *LDLR/LOX-1* double KO (dKO), *LOX-1* single KO (sKO) and *LDLR* sKO mice were starved for exogenous LDL overnight, the cells were incubated with pHrodo<sup>TM</sup> Red-labeled LDL for 3 h prior to counterstaining the nuclei. For the negative control, cells were pretreated with unlabeled LDL for 1 h. Scale bars, 100  $\mu$ m. (B) For Oil Red O staining for intracellular neutral lipids, including cholesterol, the OCL-precursors were treated with M-CSF and sRANKL for 2 days and stained with Oil Red O solution. The scale bars (upper panels in (B)) indicate 100  $\mu$ m, and the square areas were expanded (lower panels). The experiments were performed in triplicate, and reproducibility was confirmed.

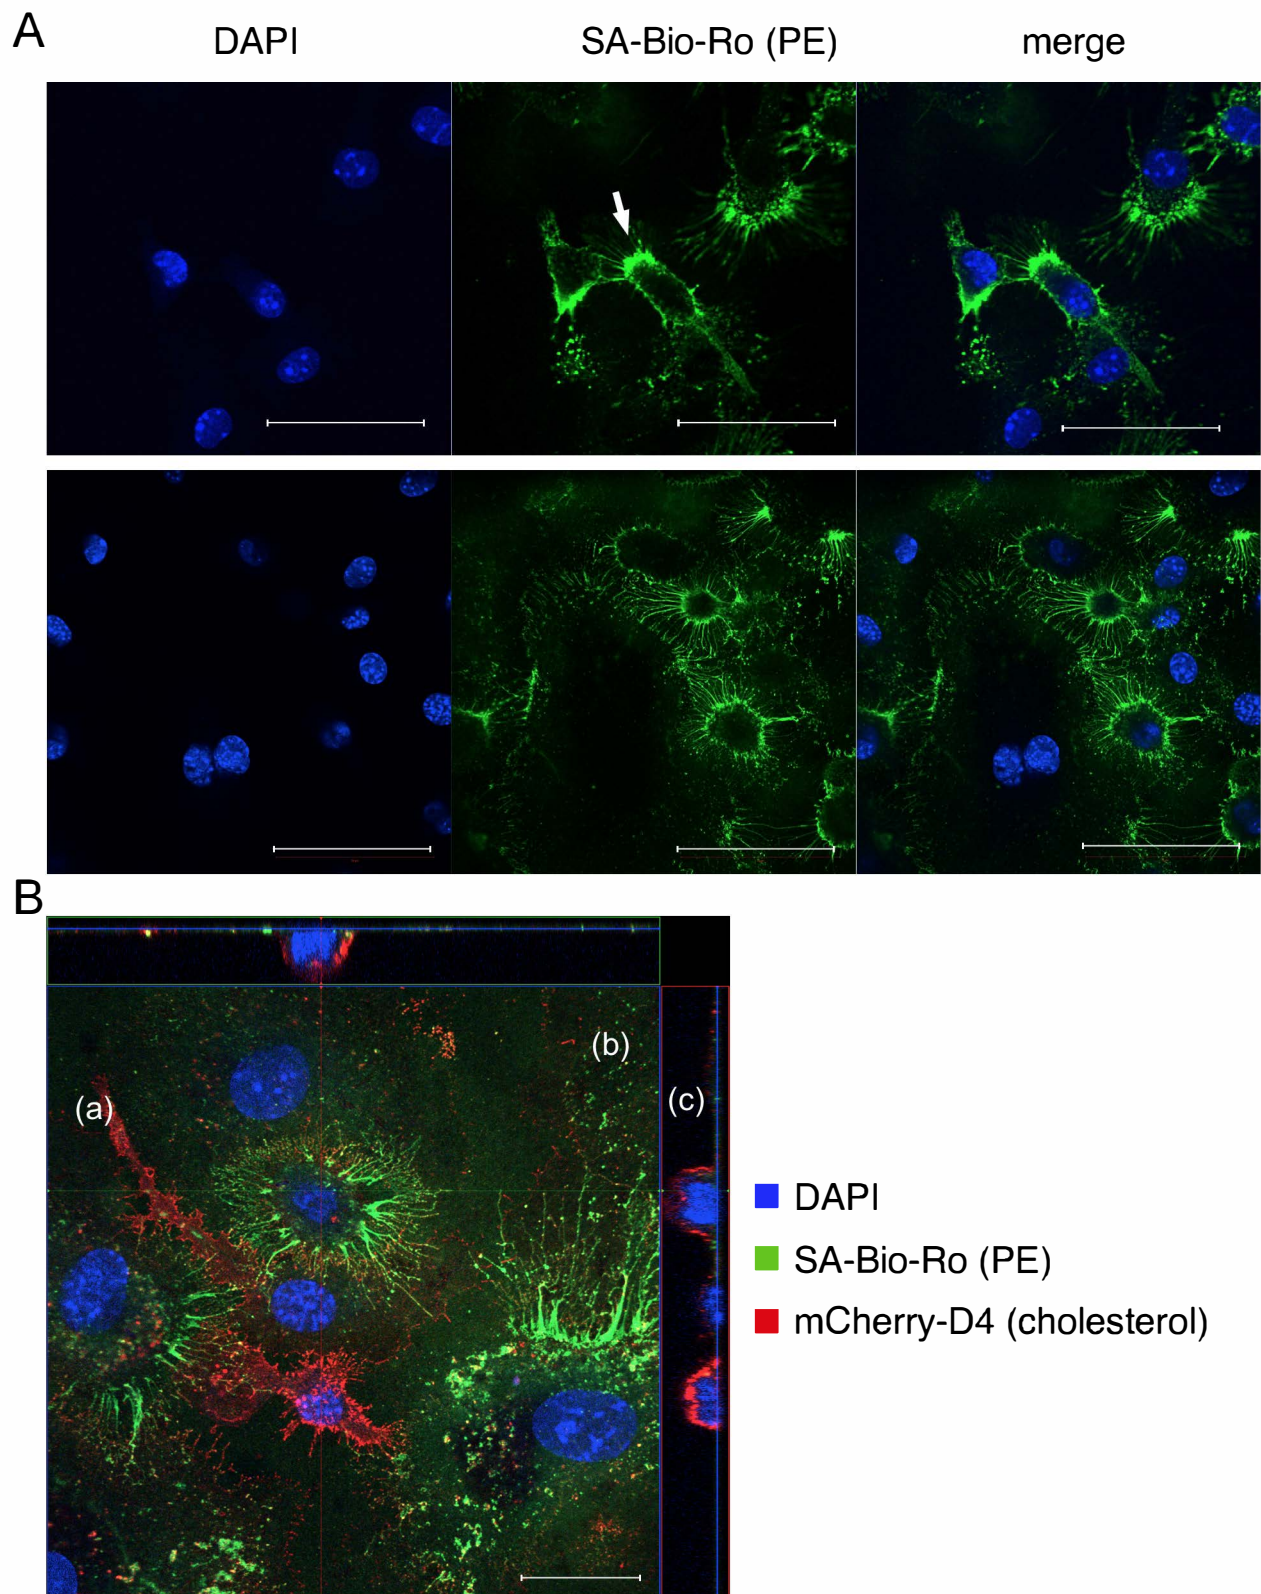

**Fig. S3. Distributions of PE and cholesterol on the cell surface of osteoclastic cells.** WT OCLs cultured with M-CSF and sRANKL for 2 days were incubated with SA-Bio-Ro for 30 min, and thereafter, the cells were fixed and immunostained by FITC-conjugated anti-SA antibody. The nuclei of the OCLs were counterstained with DAPI. The cells were observed by confocal laser microscopy. Scale bar, 20  $\mu$ m. (B) The OCLs were simultaneously incubated with both SA-Bio-Ro and His-tag-mCherry-D4. After fixation, the cells were immunostained with anti-SA antibody. Thirty-five-slice images from the bottom to the top of the cells were obtained using a Z-stack method of confocal laser microscopy, and then, the images were reconstructed. (a), XY-image. (b) and (c), XZ-images. Scale bar, 10  $\mu$ m.

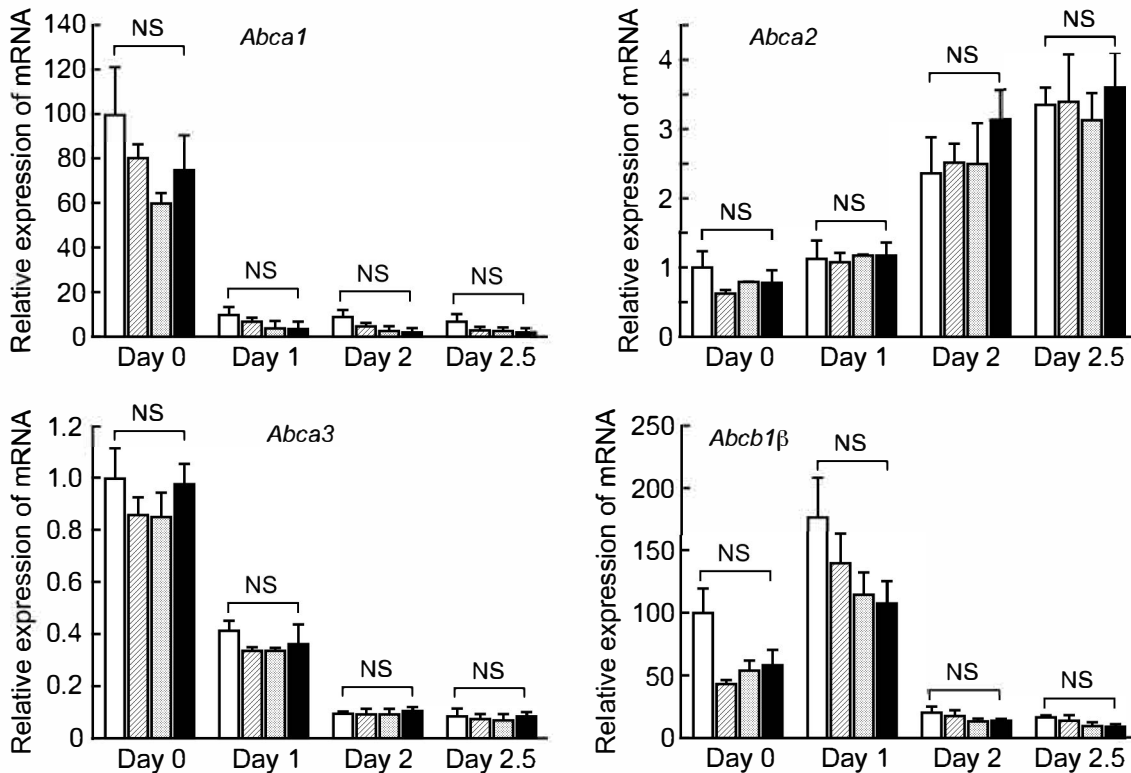

**Fig. S4. mRNA expression of ABC transporters, in addition to ABCB4 and ABCG1, in OCLs with four different g enot pes.** Osteoclast precursors from WT (open bars), *LOX-1* single KO (sKO, hatched bars), *LDLR* sKO (dotted bars) and *LDLR1/LOX-1* dKO (closed bars) bone marrow cells were cultured with sRANKL (10 ng/ml) and M-CSF (20 ng/ml) for the indicated days. After culture, total RNA was prepared, and the synthesized cDNA was subjected to quantitative real-time RT-PCR to determine the mRNA levels of ABCA1 (*Abca1*), ABCA2 (*Abca2*), ABCA3 (*Abca3*) and ABCB1 (*Abcb1*) during osteoclastogenesis. The experiments were performed in triplicate, and reproducibility was confirmed. The values represent the mean  $\pm$  SD ( $n = 3$ ). *NS* means that the difference was not significant between the cultures of WT cells and each KO OCLs of each other genotype on each day.

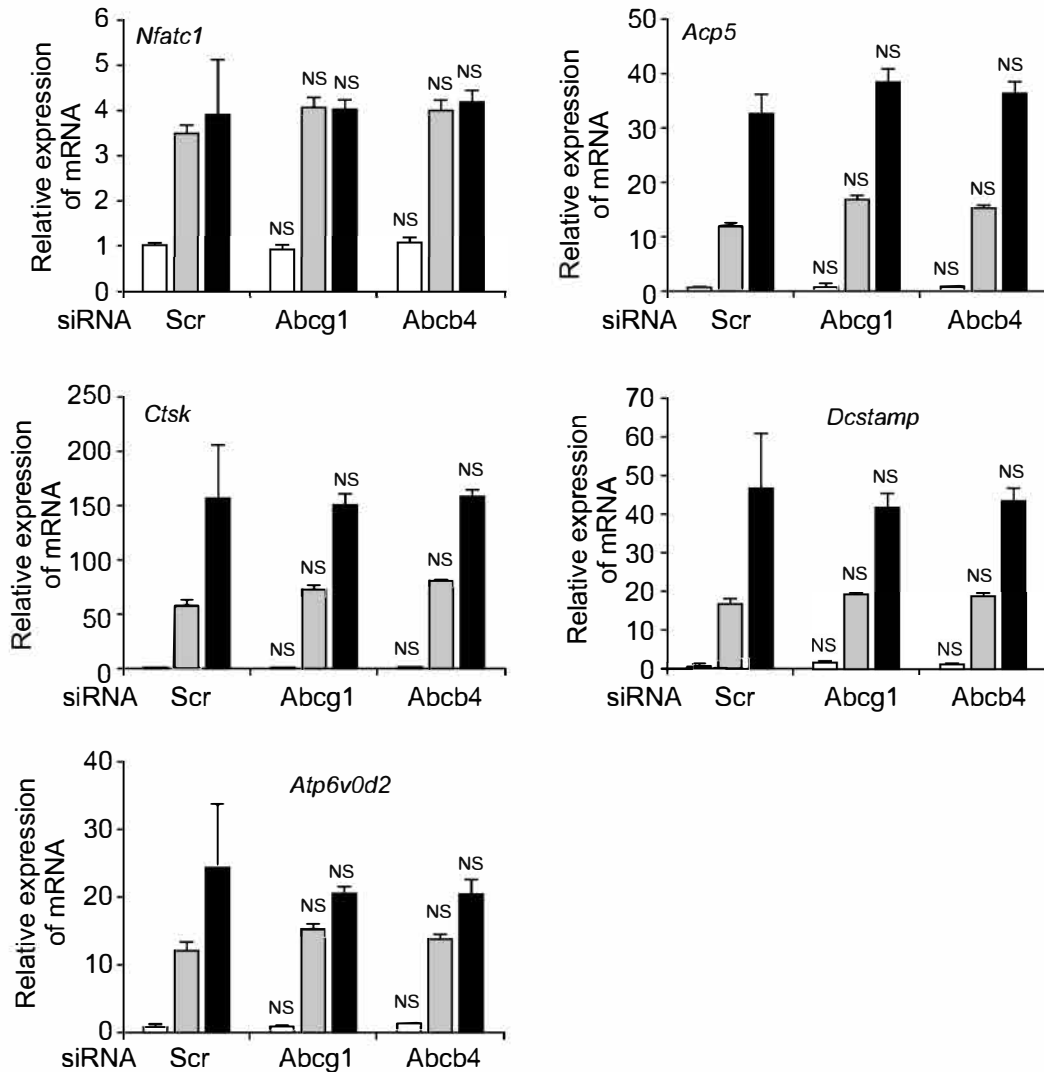

**Fig. S5. Effect of *Abcg1* and *Abcb4* mRNA knockdown on mRNA expression of osteoclast-related molecules.** WT OCL-precursors were electroporated with scramble RNA (Ser, 1  $\mu$ M, negative control), *Abcg1* siRNA (1  $\mu$ M) or *Abcb4* siRNA (1  $\mu$ M). After transduction of the siRNAs, the OCL-precursors were cultured with M-CSF and sRANKL. After culturing for one day (open bars), 2 days (gray bars) and 3 days (closed bars), the mRNA levels of *Nfatc1*, *Acp5*, *Ctsk*, *Dcstamp* and *Atp6v0d2* were determined by quantitative real-time RT-PCR. The experiments were performed in triplicate, and reproducibility was confirmed. The values represent the mean  $\pm$  SD (n = 3). \* $P < 0.05$  vs. culture of osteoclastic cells transduced by scramble RNA on each day. NS means that the difference was not significant.

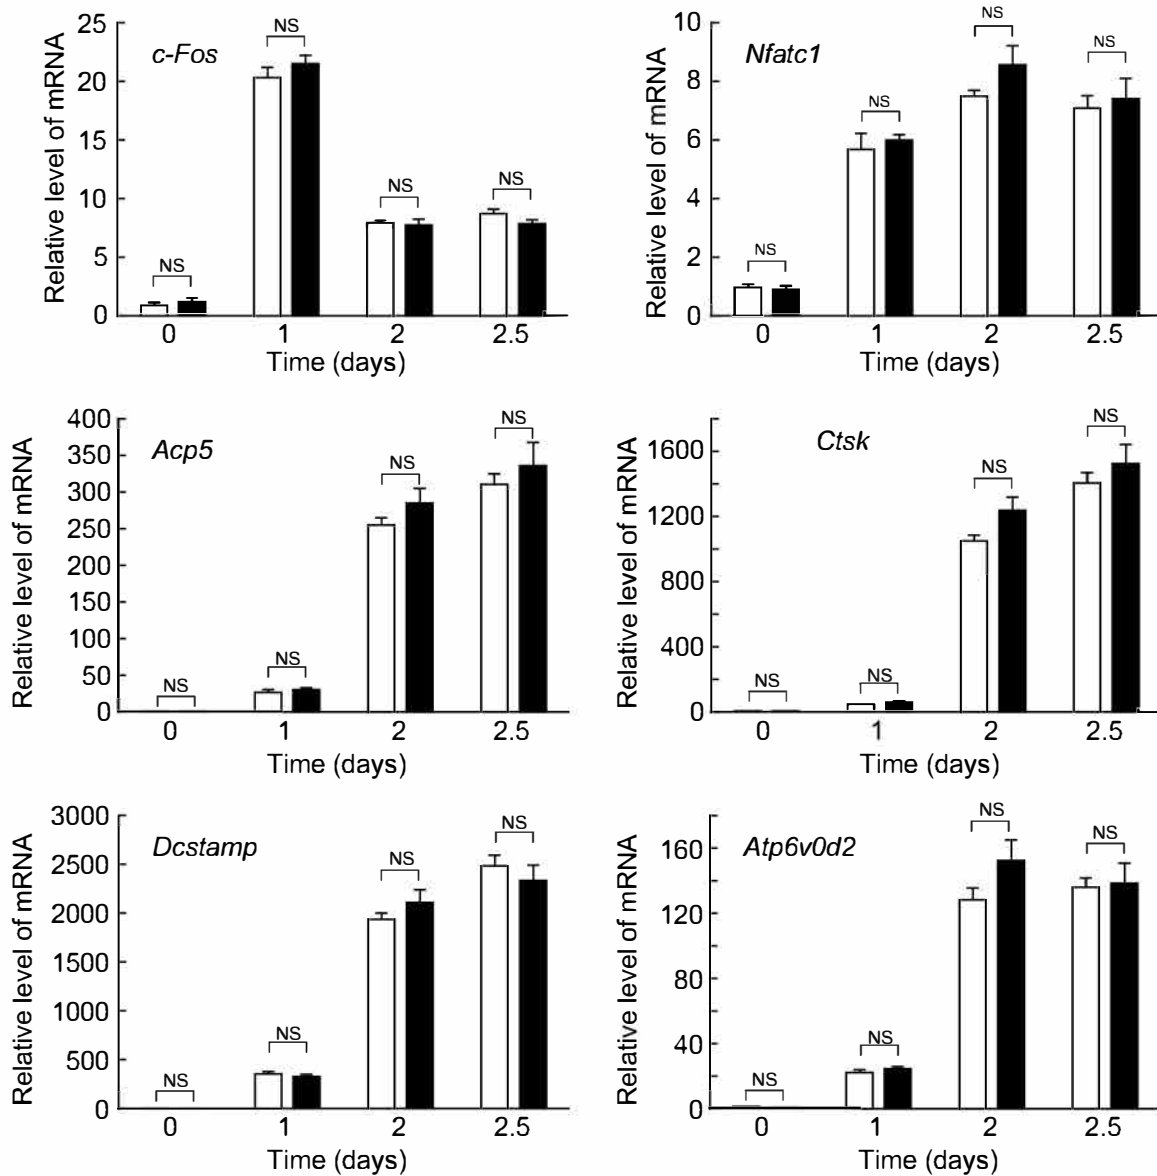

**Fig. S6. Expression of osteoclast differentiation-related genes in *Abcg1* sKO OCLs.** OCL-precursors from WT (open bars) and *ABCG1* sKO (closed bars) bone marrow cells were cultured with sRANKL (10 ng/ml) and M-CSF (20 ng/ml) for the indicated days. After culture, total RNA was prepared, and the synthesized cDNA was subjected to quantitative real-time RT-PCR to determine the mRNA levels of *c-Fos*, *Nfatc1*, *Acp5*, *Dcstamp* and *Atp6v0d2* during osteoclastogenesis. The experiments were performed in triplicate, and reproducibility was confirmed. The values represent the mean  $\pm$  SD ( $n = 3$ ). NS means that the difference was not significant between the cultures of WT cells and dKO OCLs on each day.



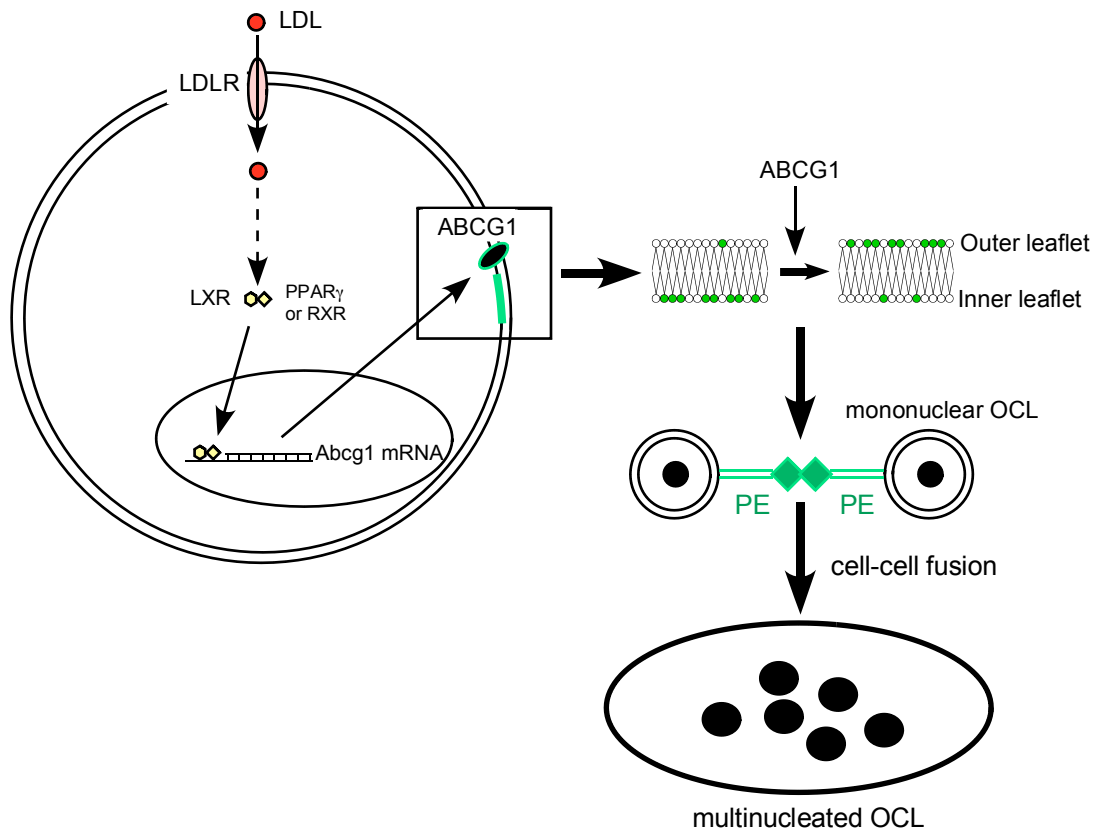

**Fig. S7.** Scheme of sequential cellular events from LDL-uptake mediated by LDLR up to the cell-cell fusion in osteoclast-like cells *in vitro*.
